# Supplementary material for: Assembly of jammed colloidal shells onto micron-sized bubbles by ultrasound
Source: Royal Society of Chemistry journal article supplement (doi:10.1039/c4sm02492c), 2015-01-01
Supplement: c4sm02492c1.pdf [file c4sm02492c1.pdf]

## Supporting Information

### Assembly of jammed colloidal shells onto micron-sized bubbles by ultrasound

C Buchcic<sup>1,2,\*</sup>, RH Tromp<sup>1,3</sup>, MBJ Meinders<sup>1,4</sup>,  
MA Cohen Stuart<sup>2</sup>

<sup>1</sup>Top Institute Food and Nutrition, Wageningen, The Netherlands

<sup>2</sup>Laboratory of Physical Chemistry and Colloid Science, Wageningen, The Netherlands

<sup>3</sup>Nizo Food Research, Ede, The Netherlands

<sup>4</sup>Wageningen UR, Food and Biobased Research, Wageningen, The Netherlands

\*e-mail: christian.buchcic@wur.nl

#### Electrokinetic charge of the colloidal particles

The electrokinetic charge of the synthesized particles was analysed with a Malvern Nanosizer S apparatus. Prior analysis the particle dispersion was diluted with water. Adjustment of the pH was done through dropwise addition of 0.1 M hydrochloric acid respectively 0.1 M sodium hydroxide under exclusion of air. About 750  $\mu$ l of particle dispersion was filled into a disposable folded capillary cell. The applied electrical current was automatically regulated by the in-built software algorithm. Zeta potential vs. pH is depicted in Fig. S 1.

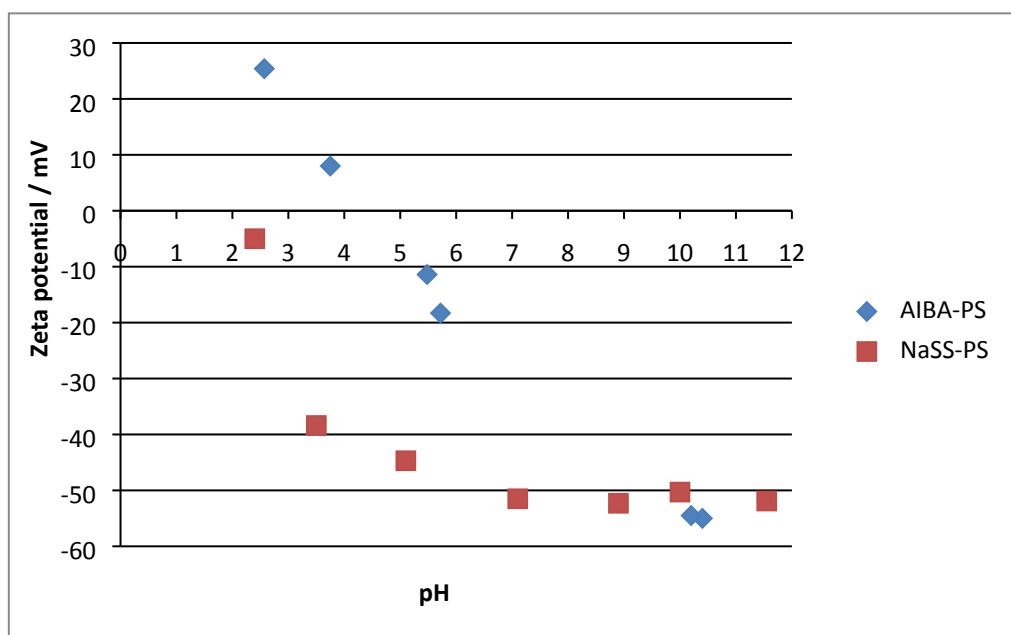

Fig. S 1: Particle zeta potential as function of pH
